# Supplementary material for: A Post-Marketing Surveillance Study of Nusinersen for Spinal Muscular Atrophy in Routine Medical Practice in China: Interim Results
Source: PubMed Central journal article supplement — Adv Ther. 2024 May 9;41(7):2743–56. doi: 10.1007/s12325-024-02852-7 (PMC11213752; doi:10.1007/s12325-024-02852-7), 2024-05-09
Supplement: 12325_2024_2852_MOESM1_ESM.pdf [file 12325_2024_2852_MOESM1_ESM.pdf]

## Supplementary Materials

### A post-marketing surveillance study of nusinersen for spinal muscular atrophy in routine medical practice in China: interim results

Yuwu Jiang,<sup>1</sup> Yi Wang,<sup>2</sup> Hui Xiong,<sup>1,3</sup> Wenhui Li,<sup>2</sup> Rong Luo,<sup>4</sup> Wenxiong Chen,<sup>5</sup> Fei Yin,<sup>6</sup> Junlan Lü,<sup>3</sup> Jianmin Liang,<sup>7</sup> Wan-Jin Chen,<sup>8</sup> Xinguo Lu,<sup>9</sup> Hua Wang,<sup>10</sup> Jihong Tang,<sup>11</sup> Michael Monine,<sup>12</sup> Corinne Makepeace,<sup>13</sup> Xin Jin,<sup>14\*</sup> Richard Foster,<sup>13</sup> Russell Chin,<sup>12\*</sup> Zdenek Berger<sup>12</sup>

\*at the time of development

<sup>1</sup>*Peking University First Hospital, Beijing, China*

<sup>2</sup>*Children's Hospital of Fudan University, Shanghai, China*

<sup>3</sup>*Beijing Children's Hospital, Capital Medical University, National Center for Children's Health, Beijing, China*

<sup>4</sup>*West China Second University Hospital, Sichuan University, Chengdu, Sichuan, China*

<sup>5</sup>*Guangzhou Women and Children's Medical Center, Guangdong, China*

<sup>6</sup>*Xiangya Hospital of Central South University, Changsha, Hunan, China*

<sup>7</sup>*The First Bethune Hospital of Jilin University, Changchun, Jilin, China*

<sup>8</sup>*The First Affiliated Hospital of Fujian Medical University, Fuzhou, Fujian, China*

<sup>9</sup>*Shenzhen Children's Hospital, Shenzhen, China*

<sup>10</sup>*Shengjing Hospital of China Medical University, Shenyang, Liaoning, China*

<sup>11</sup>*Children's Hospital of Soochow University, Suzhou, Jiangsu, China*

<sup>12</sup>*Biogen, Cambridge, MA, USA*

<sup>13</sup>*Biogen, Maidenhead, Berkshire, UK*

<sup>14</sup>*Cytel, Cambridge, MA, USA*

**Corresponding author:**

Zdenek Berger, PhD

Biogen, 225 Binney St,

Cambridge, MA 02142, USA

Zdenek.berger@biogen.com

**Figure S1.** Participant disposition

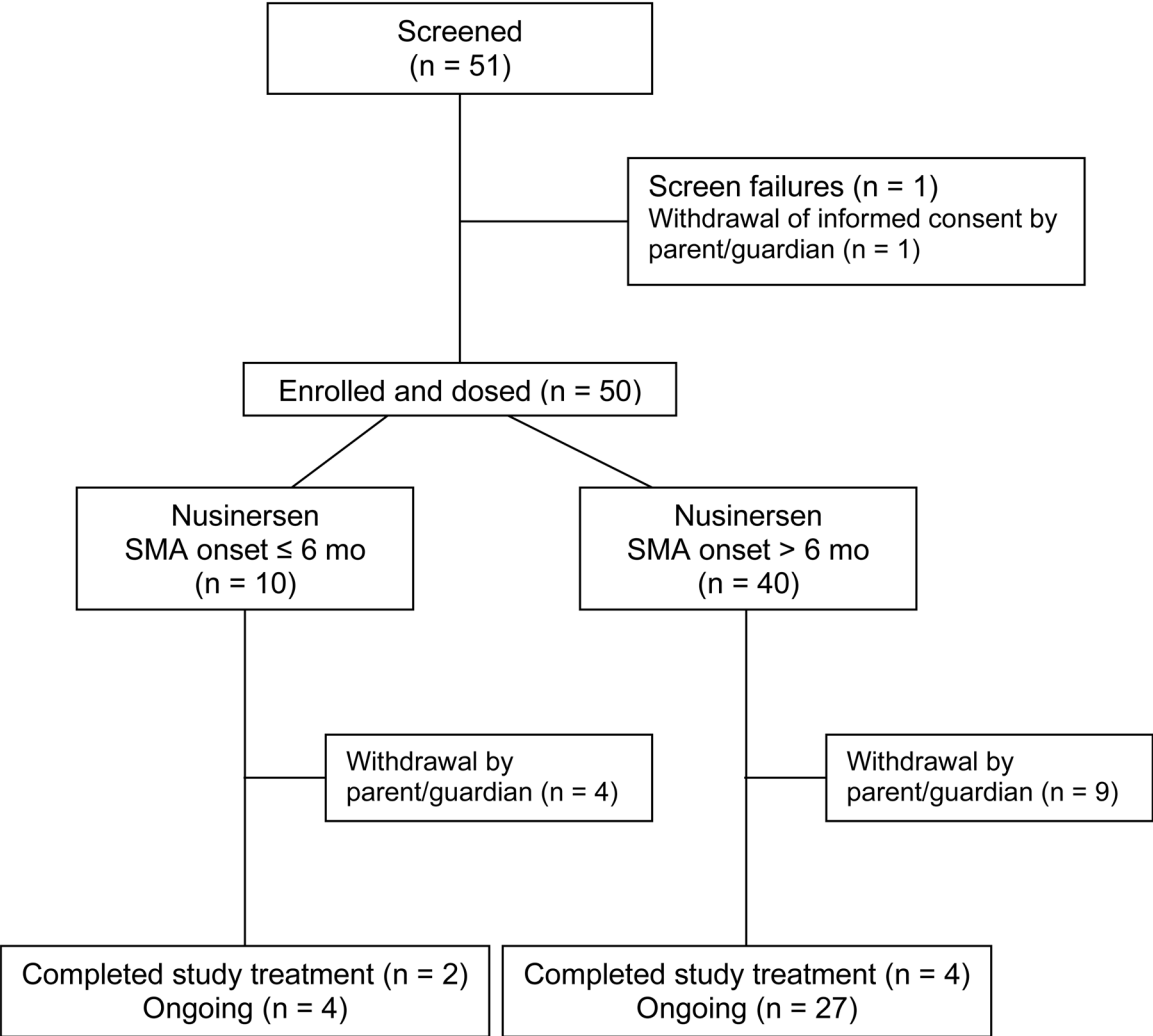

**Figure S2.** Gradual improvement was observed in mean (SD) HINE Section 2 total motor milestone scores of participants with full study data, **A)** total motor milestone score and **B)** change from baseline over time

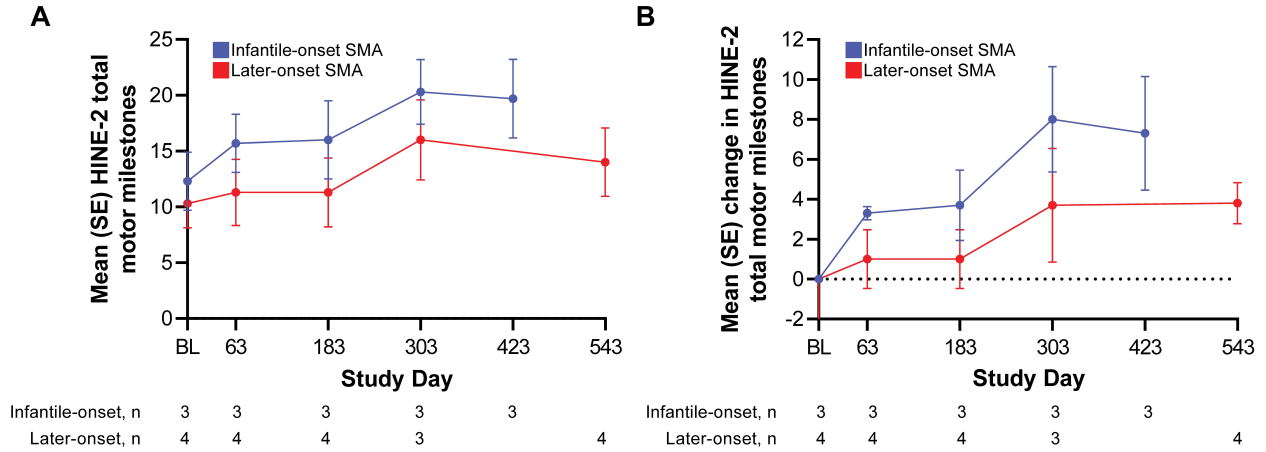

*BL* baseline, *HINE* Hammersmith Infant Neurological Examination, *SMA* spinal muscular atrophy

**Figure S3.** Individual time-dependent CSF trough concentrations of nusinersen at planned study day visits for overall participants (n = 50)

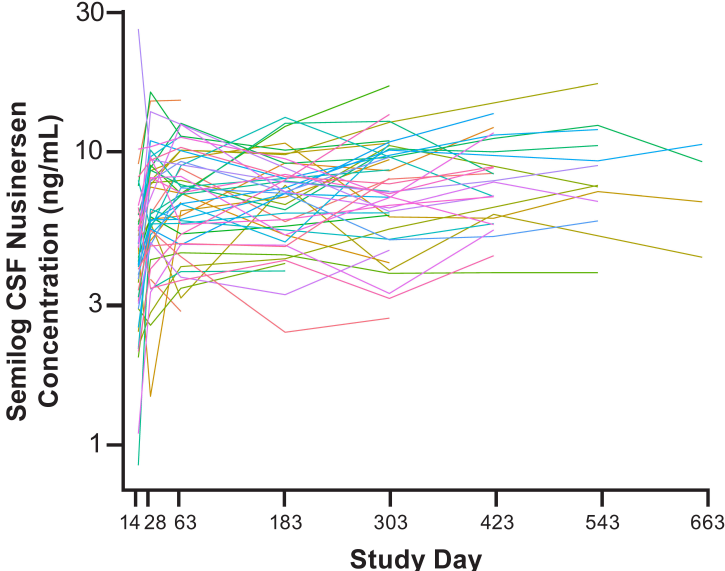

CSF cerebrospinal fluid
